# Supplementary material
Source: HighWire-hosted journal article supplement (https://jitc.bmj.com/content/8/2/e001521)

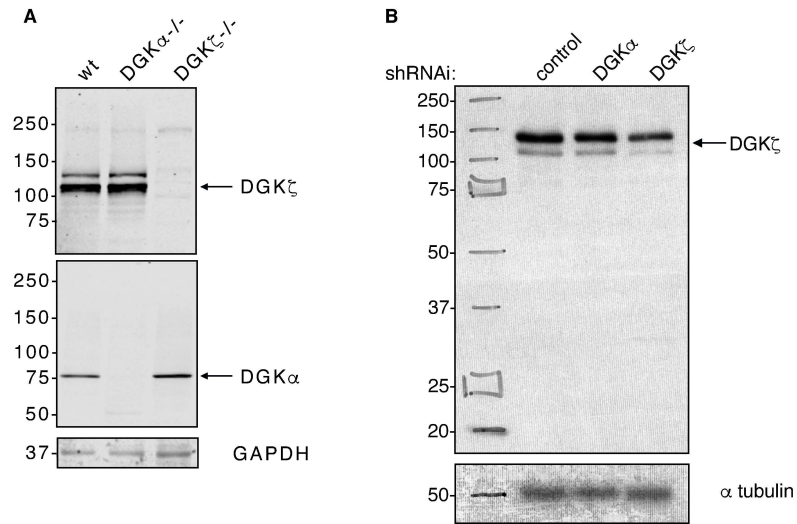

Figure S2

Supplement: inline-supplementary-material-2 [file inline-supplementary-material-2.pdf]
